# Supplementary material
Source: PubMed Central journal article supplement (PMC9588614)
Supplement: NIHMS1839594-supplement-1.pdf [file NIHMS1839594-supplement-1.pdf]

**Table S1. Primers used for cloning CD163 receptor orthologs, related to Figure 4**

| Host                          | Fwd    | Primer sequence (5' -> 3') | Reverse | Primer sequence (5' -> 3') |
|-------------------------------|--------|----------------------------|---------|----------------------------|
| Human                         | CJW515 | ATGAACAAACTCAGAATGGTGCC    | CJW544  | TCAGTGTGGCTCAGAATGG        |
| Common chimpanzee             | CJW516 | ATGAGCAAACCTCAGAATGGTGCT   | CJW544  | TCAGTGTGGCTCAGAATGG        |
| Red-cheeked gibbon            | CJW516 | ATGAGCAAACCTCAGAATGGTGCT   | CJW555  | TCAGTGTGCCTCAGAATGG        |
| Northern white-cheeked gibbon | CJW516 | ATGAGCAAACCTCAGAATGGTGCT   | CJW555  | TCAGTGTGCCTCAGAATGG        |
| Lar gibbon                    | CJW516 | ATGAGCAAACCTCAGAATGGTGCT   | CJW555  | TCAGTGTGCCTCAGAATGG        |
| Grivet (MA-104)               | CJW517 | ATGAACAAACTCAGAATGGTGCT    | CJW555  | TCAGTGTGCCTCAGAATGG        |
| Grivet (Vero)                 | CJW516 | ATGAGCAAACCTCAGAATGGTGCT   | CJW555  | TCAGTGTGCCTCAGAATGG        |
| Patas monkey                  | CJW517 | ATGAACAAACTCAGAATGGTGCT    | CJW555  | TCAGTGTGCCTCAGAATGG        |
| Collared mangabey             | CJW517 | ATGAACAAACTCAGAATGGTGCT    | CJW555  | TCAGTGTGCCTCAGAATGG        |
| Black crested mangabey        | CJW517 | ATGAACAAACTCAGAATGGTGCT    | CJW555  | TCAGTGTGCCTCAGAATGG        |
| Rhesus monkey                 | CJW517 | ATGAACAAACTCAGAATGGTGCT    | CJW556  | TCAGTGTGTCTCAGAATGGC       |
| Angolan talapoin              | CJW517 | ATGAACAAACTCAGAATGGTGCT    | CJW555  | TCAGTGTGCCTCAGAATGG        |
| Wolf's mona monkey            | CJW516 | ATGAGCAAACCTCAGAATGGTGCT   | CJW555  | TCAGTGTGCCTCAGAATGG        |
| François' langur              | CJW516 | ATGAGCAAACCTCAGAATGGTGCT   | CJW556  | TCAGTGTGTCTCAGAATGGC       |
| Mantled guereza               | CJW515 | ATGAACAAACTCAGAATGGTGCC    | CJW555  | TCAGTGTGCCTCAGAATGG        |
| Nancy Ma's night monkey       | CJW519 | ATGAACAAACTCGGAATGATGCT    | CJW555  | TCAGTGTGCCTCAGAATGG        |
| Bolivian red howler           | CJW519 | ATGAACAAACTCGGAATGATGCT    | CJW556  | TCAGTGTGTCTCAGAATGGC       |
